# Supplementary material
Source: PubMed Central journal article supplement (PMC6939193)
Supplement: EMBJ-39-e102190-s001.pdf [file EMBJ-39-e102190-s001.pdf]

## Appendix

### Table of contents:

|            |    |
|------------|----|
| Figure S1  | 2  |
| Figure S2  | 3  |
| Figure S3  | 5  |
| Figure S4  | 6  |
| Figure S5  | 8  |
| Figure S6  | 9  |
| Figure S7  | 10 |
| Figure S8  | 11 |
| Figure S9  | 12 |
| Figure S10 | 14 |
| Figure S11 | 15 |
| Table S1   | 17 |
| Table S2   | 17 |
| Table S3   | 18 |
| Table S4   | 19 |
| Table S5   | 20 |
| Table S6   | 20 |
| Table S7   | 20 |

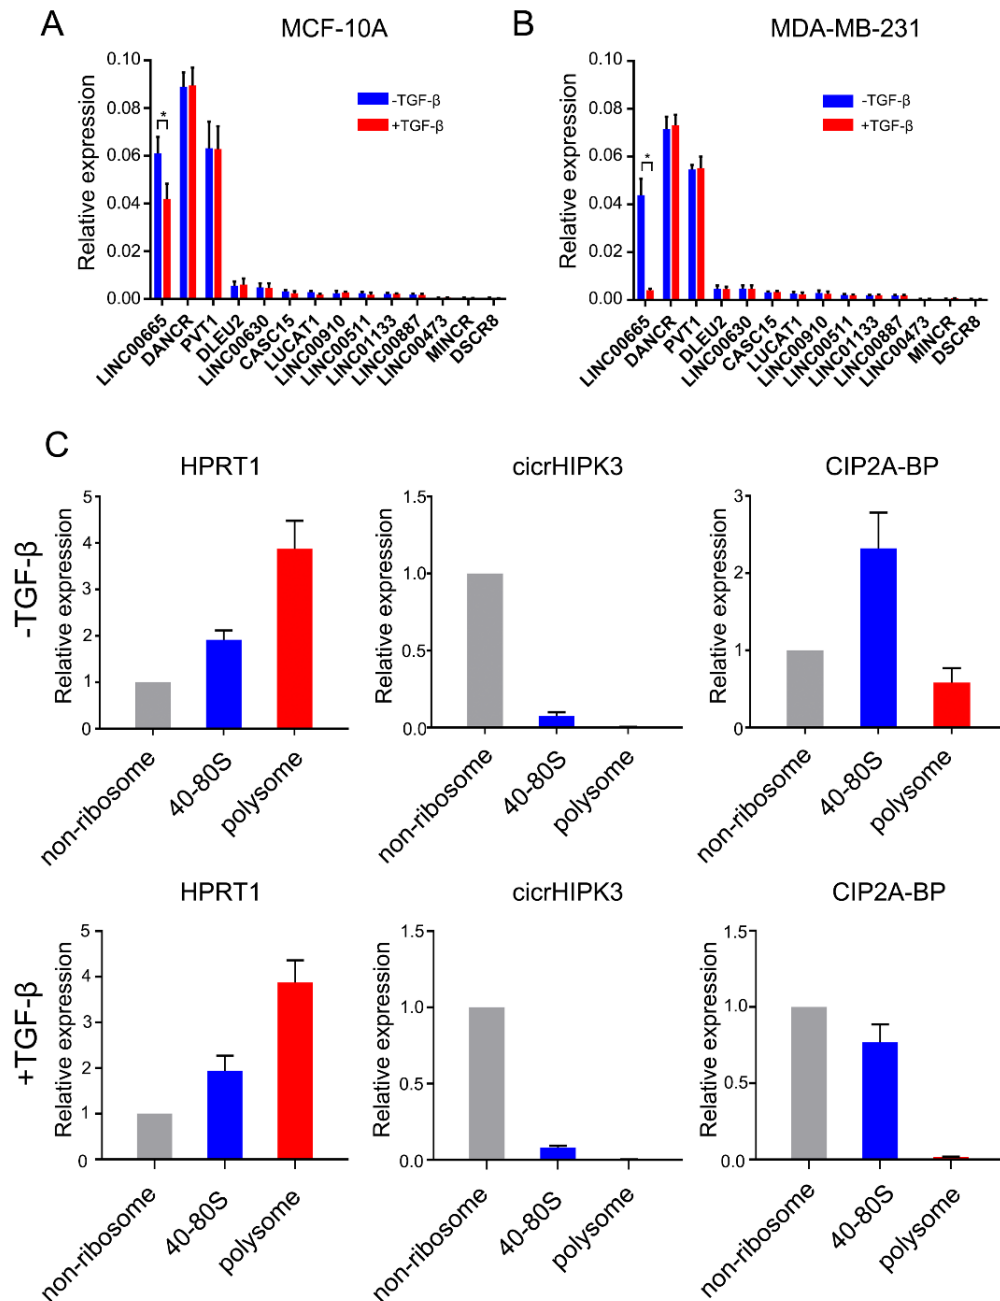

## Appendix Figure S1. Screening of candidate lncRNA

(A) Relative levels of the indicated lncRNA were determined by polysome profiling and qRT-PCR in MCF-10A either mock treated or treated with TGF- $\beta$ .

(B) Relative levels of the indicated lncRNA were determined by polysome profiling and qRT-PCR in MDA-MB-231 either mock treated or treated with TGF- $\beta$ .

(C) MCF-10A cell either mock treated or treated with TGF- $\beta$  and whole lysates were fractionated to collect

non-ribosome, 40S-80S and polysome fractions by sucrose gradient centrifugation. HPRT1, circHIPK3 and CIP2A-BP transcripts in these fractions were quantified by qPCR.

Data information: Data are representative of 3 independent experiments (A-C). Data were assessed by paired Student's t test (A and B) and are represented as mean  $\pm$  SD. \* $P < 0.05$ .

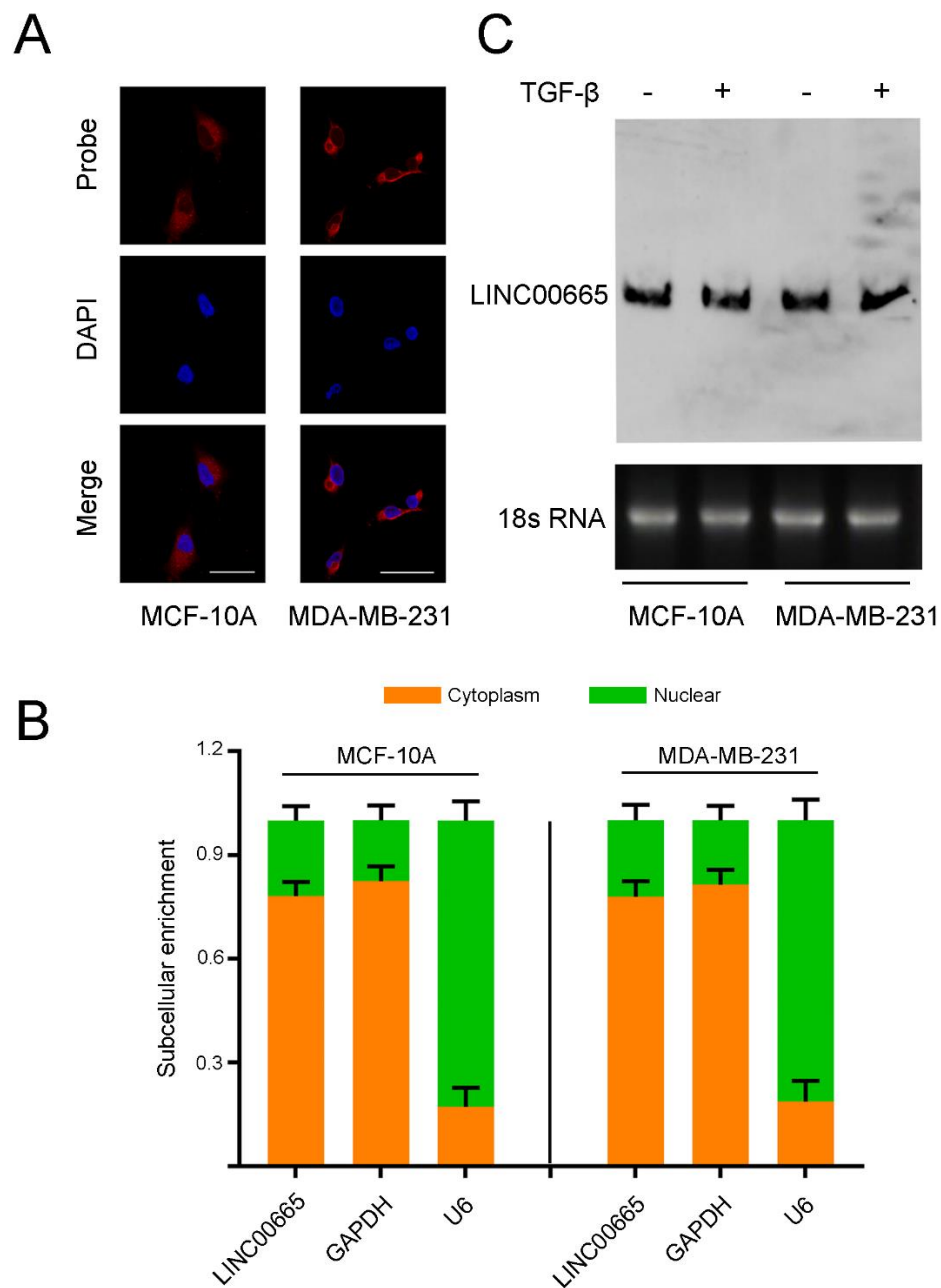

## Appendix Figure S2. Biologic characterization of LINC00665

(A) RNA fluorescence in situ hybridization analysis of *LINC00665*.

(B) Relative abundance of *LINC00665* transcript in cytoplasmic and nuclear fractions from MCF-10A and MDA-MB-231 cell lines. GAPDH and U6 were used as cytoplasmic and nuclear controls respectively.

(C) Northern-blot analysis of *LINC00665* in MCF-10A and MDA-MB-231 either mock treated or treated with TGF- $\beta$ .

Data information: Data are representative of 3 independent experiments (B). Scale bars: 50 $\mu$ m (A).

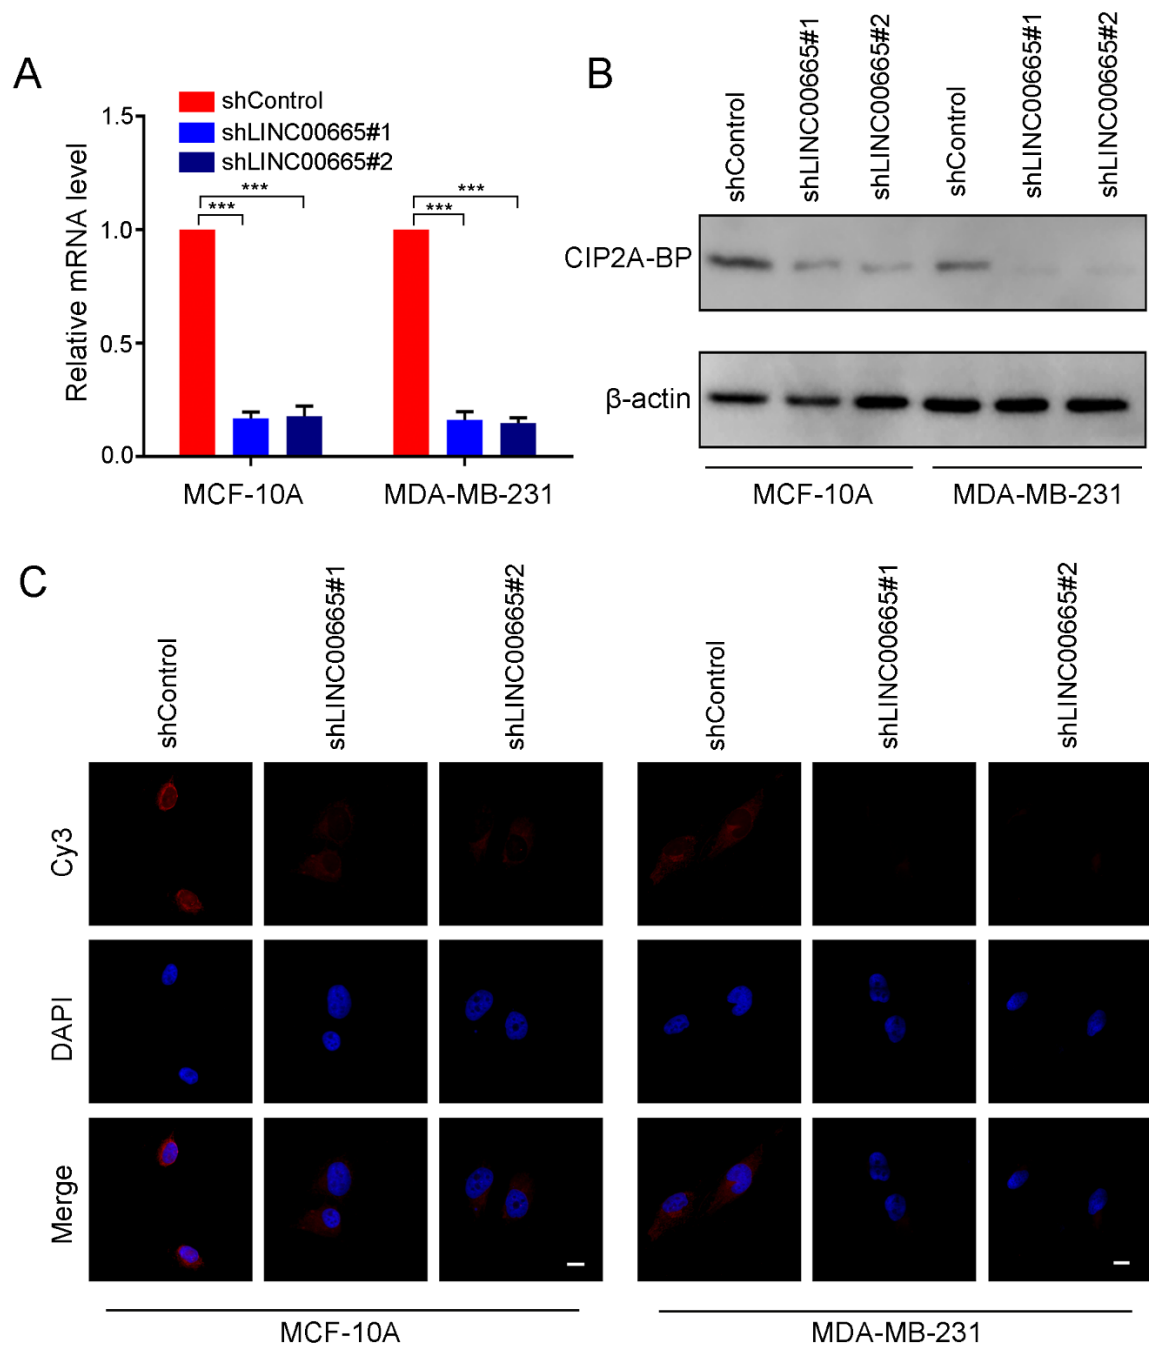

### Appendix Figure S3. Anti-CIP2A-BP antibody specifically detects the micropeptide CIP2A-BP

MCF-10A and MDA-MB-231 cells were transfected with *LINC00665* specific shRNA respectively.

(A) Relative *LINC00665* RNA levels were determined by qRT-PCR.

(B) Micropeptide CIP2A-BP levels were determined by western blot using anti-CIP2A-BP antibody in the indicated cells.

(C) Micropeptide CIP2A-BP was immune-stained with anti-CIP2A-BP antibody in the indicated cells.

Data information: Data are representative of 3 independent experiments (A). Data were assessed by paired Student's t test (A) and are represented as mean  $\pm$  SD. \*\*\* $P < 0.01$ . Scale bars, 10 $\mu$ m (C).

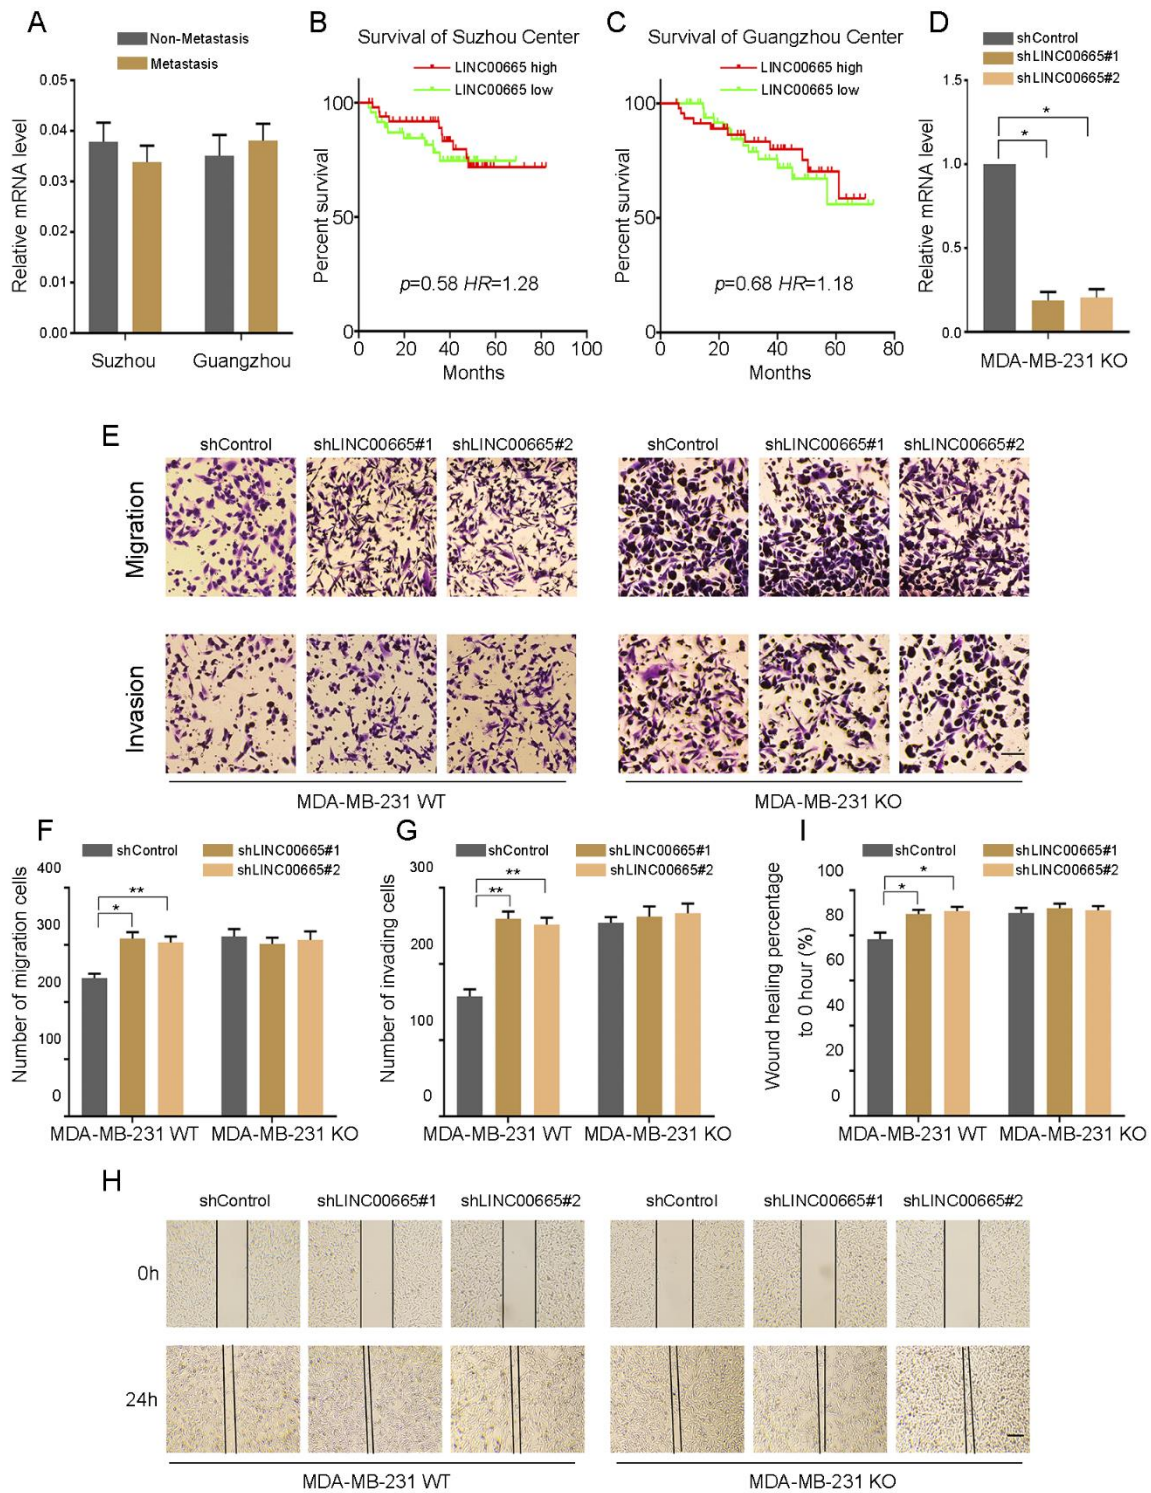

**Appendix Figure S4. The *LINC00665* transcript had no significant effect on the progression of TNBC**

(A) Relative levels of *LINC00665* were determined by qRT-PCR in non-metastatic and metastatic TNBC tissues in the Suzhou and Guangzhou cohorts, respectively.

(B and C) Kaplan-Meier overall survival curves for TNBC patients with high or low *LINC00665* expression in Suzhou and Guangzhou cohorts, respectively.

(D) Relative *LINC00665* RNA levels were determined by qRT-PCR.

(E) Migration and invasion abilities of the indicated cells were determined using Transwell assays.

(F and G) The quantification of cells that migrated through the membrane without the Matrigel (F) and invaded through Matrigel-coated membrane (G).

(H) The indicated cells were seeded on cell culture inserts for wound-healing assay, the wound edges were photographed at the indicated time points after wounding.

(I) The quantification of the relative wound healing area.

Data information: Data are representative of 3 independent experiments (D, F, G and I). Data were assessed by paired Student's t test (D, F, G and I) and are represented as mean  $\pm$  SD. Survival differences were analyzed using the log-rank test (B and C). \* $P < 0.05$ ; \*\* $P < 0.01$ . Scale bars: 50 $\mu$ m (E), 200 $\mu$ m (H).

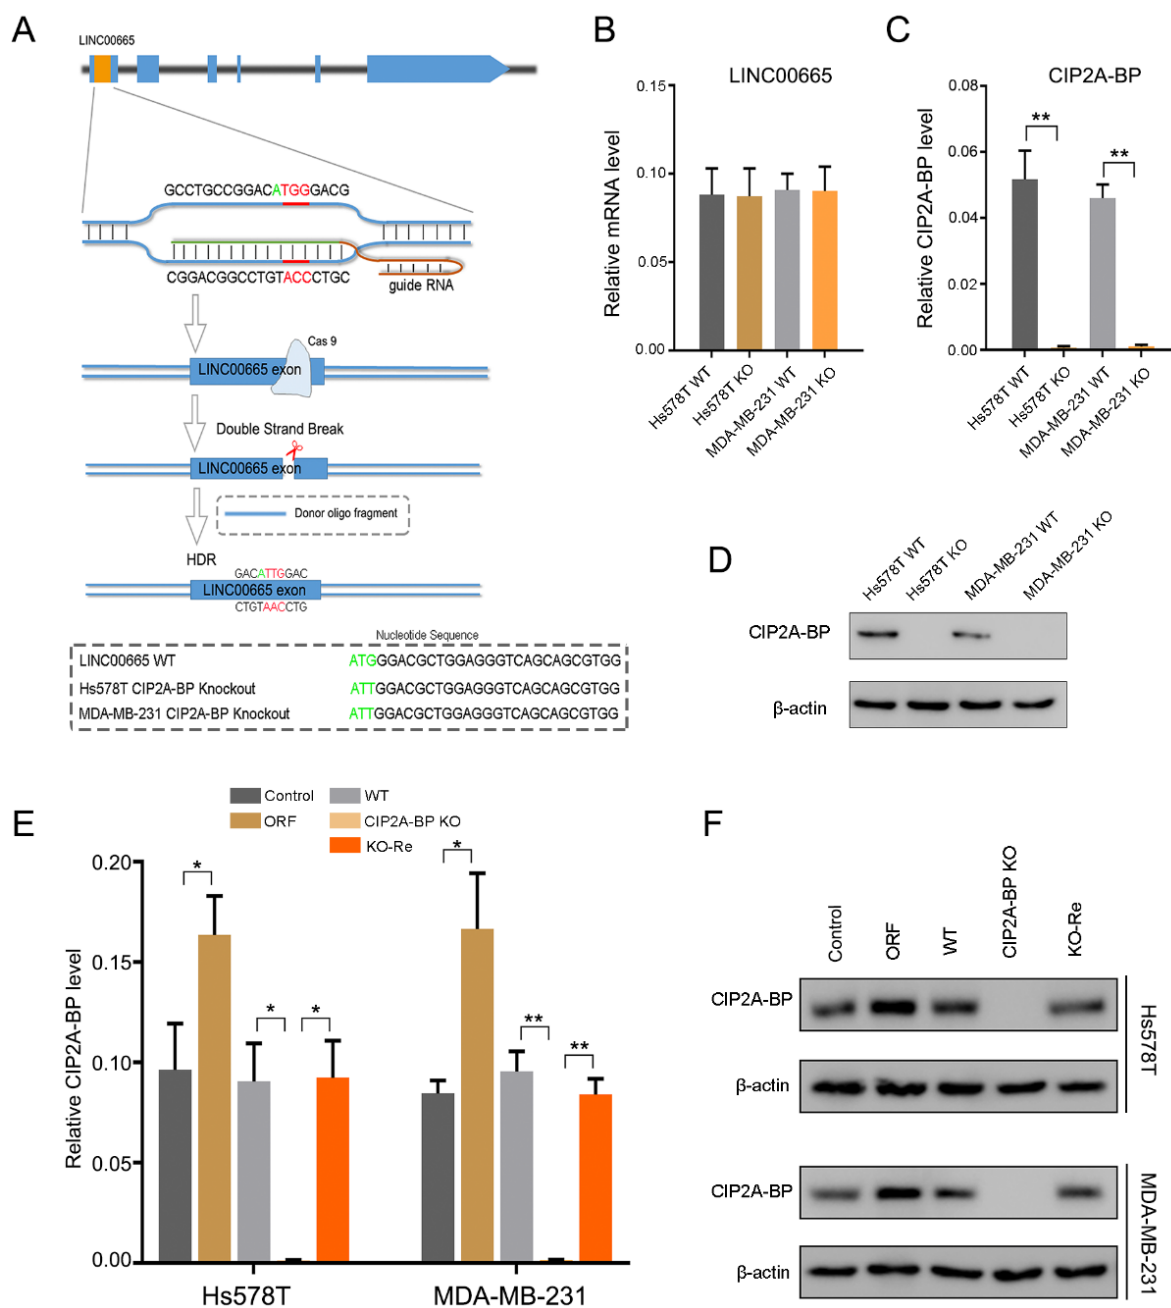

## Appendix Figure S5. Micropeptide CIP2A-BP was stably overexpressed or knocked out

(A) Upper: diagram of generation of CIP2A-BP knock-out breast cancer cell lines using CRISP/Cas9 system.

Lower: nucleotide sequence alignment of wild-type (WT) ORF 1 of human *LINC00665* and representative mutated *LINC00665* forms.

(B) Relative *LINC00665* RNA levels were determined by qRT-PCR in the indicated cells.

(C and E) Relative levels of micropeptide CIP2A-BP were determined by polysome profiling and qRT-PCR

in the indicated cells.

(D and F) Micropeptide CIP2A-BP levels were determined by western blot using anti-CIP2A-BP antibody in the indicated cells.

Data information: Data are representative of 3 independent experiments (B-E). Data were assessed by paired Student's t test (B-E) and are represented as mean  $\pm$  SD. \* $P < 0.05$ ; \*\* $P < 0.01$ .

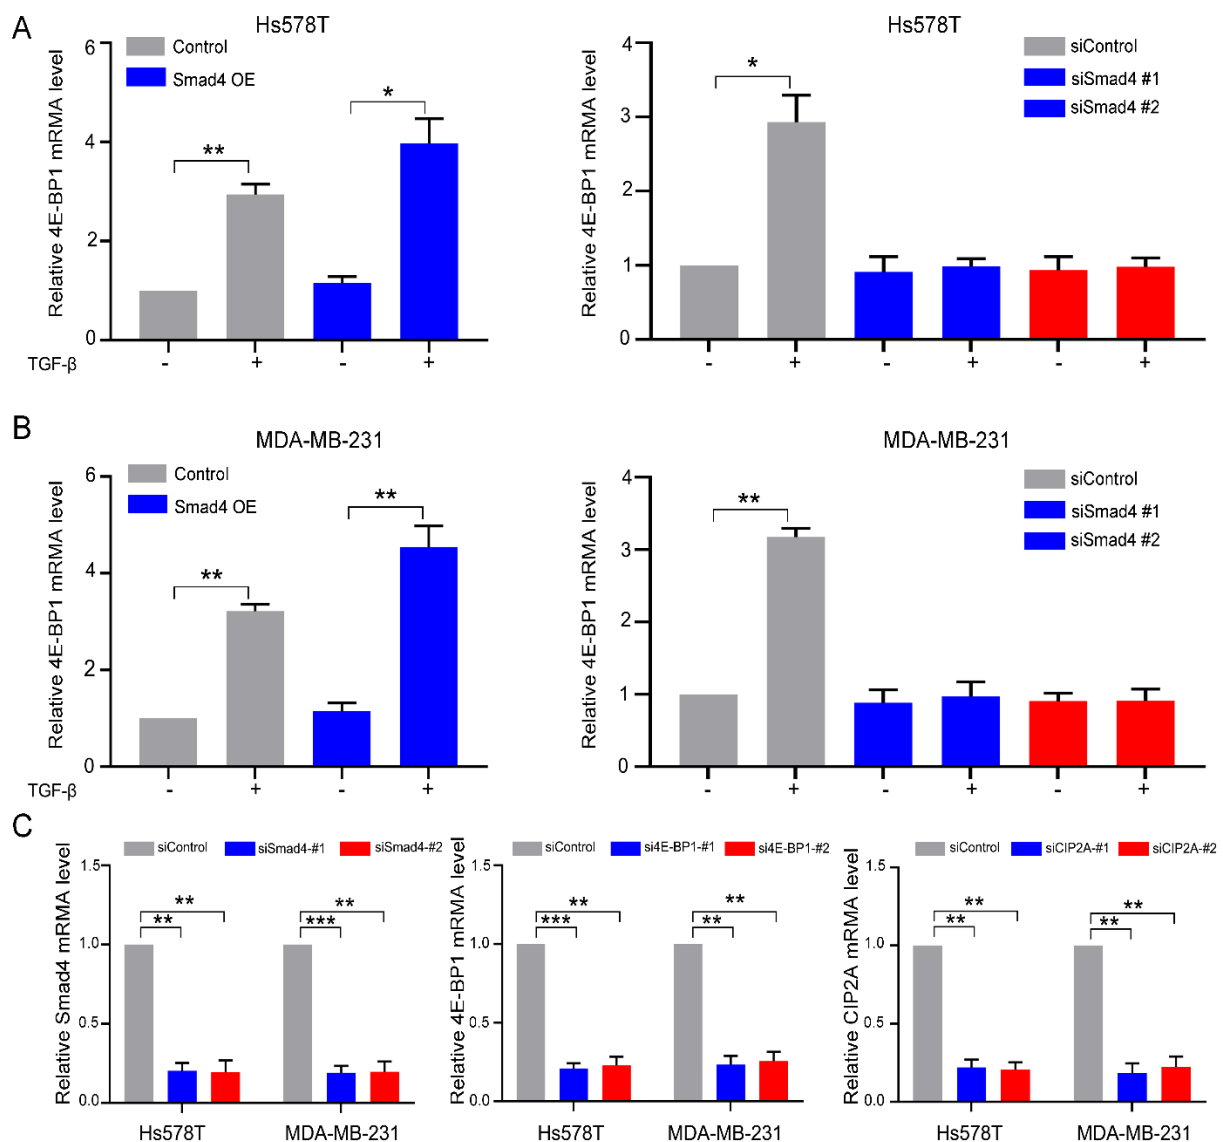

**Appendix Figure S6. TGF- $\beta$ /Smad4 signaling pathway increased endogenous 4E-BP1 mRNA level**

(A and B) Endogenous 4E-BP1 mRNA is elevated by TGF- $\beta$  and Smad4 in Hs578T(A) and MDA-MB-231(B) cells.

(C) The mRNA levels of *Smad4*, *4E-BP1* and *CIP2A* in Hs578T and MDA-MB-231 cells that transfected with specific siRNA are significantly lower than that in cells transfected with empty vector.

Data information: Data are representative of 3 independent experiments (A, B and C). Data were assessed by paired Student's t test and are represented as mean  $\pm$  SD. \* $P < 0.05$ ; \*\* $P < 0.01$ ; \*\*\* $P < 0.001$ .

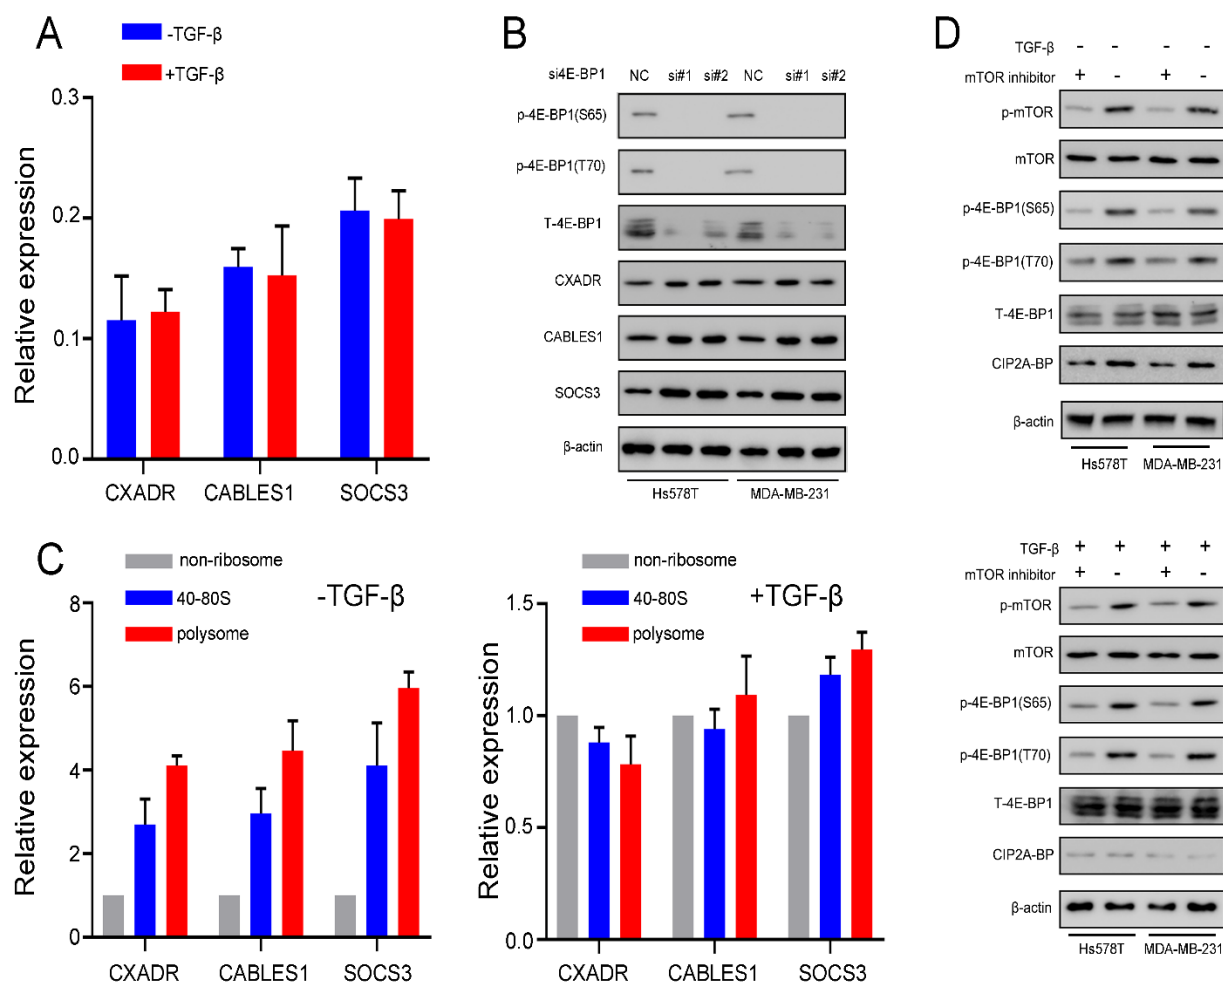

## Appendix Figure S7. 4E-BP1 affect the translation of multiple mRNAs

By analyzing the original data of this study (GSE59817), 429 genes were identified, whose translation but not transcription was decreased significantly by TGF-β treatment ( $\log_{2}FC < -1$ ,  $FDR < 0.05$ ).

(A) Relative levels of CXADR, CABLES1 and SOCS3 mRNA were determined by qRT-PCR in MCF-10A either mock treated or treated with TGF-β.

(B) Downregulation of 4E-BP1 by siRNA treatment significantly upregulated protein levels of CXADR, CABLES1 and SOCS3 determined by western blot analysis.

(C) TGF- $\beta$  treatment of MCF-10A cell significantly reduced the percentage of CXADR, CABLES1 and SOCS3 mRNA in the 40-80S and polysome fractions.

(D) TNBC cells were pretreated with specific antagonist against mTOR (PP242, 1 $\mu$ M) for 1h and then cultured with or without TGF- $\beta$ . The indicated proteins were determined by immunoblotting analysis.

Data information: Data are representative of 3 independent experiments (A and C). Data were assessed by paired Student's t test (A) and are represented as mean  $\pm$  SD.

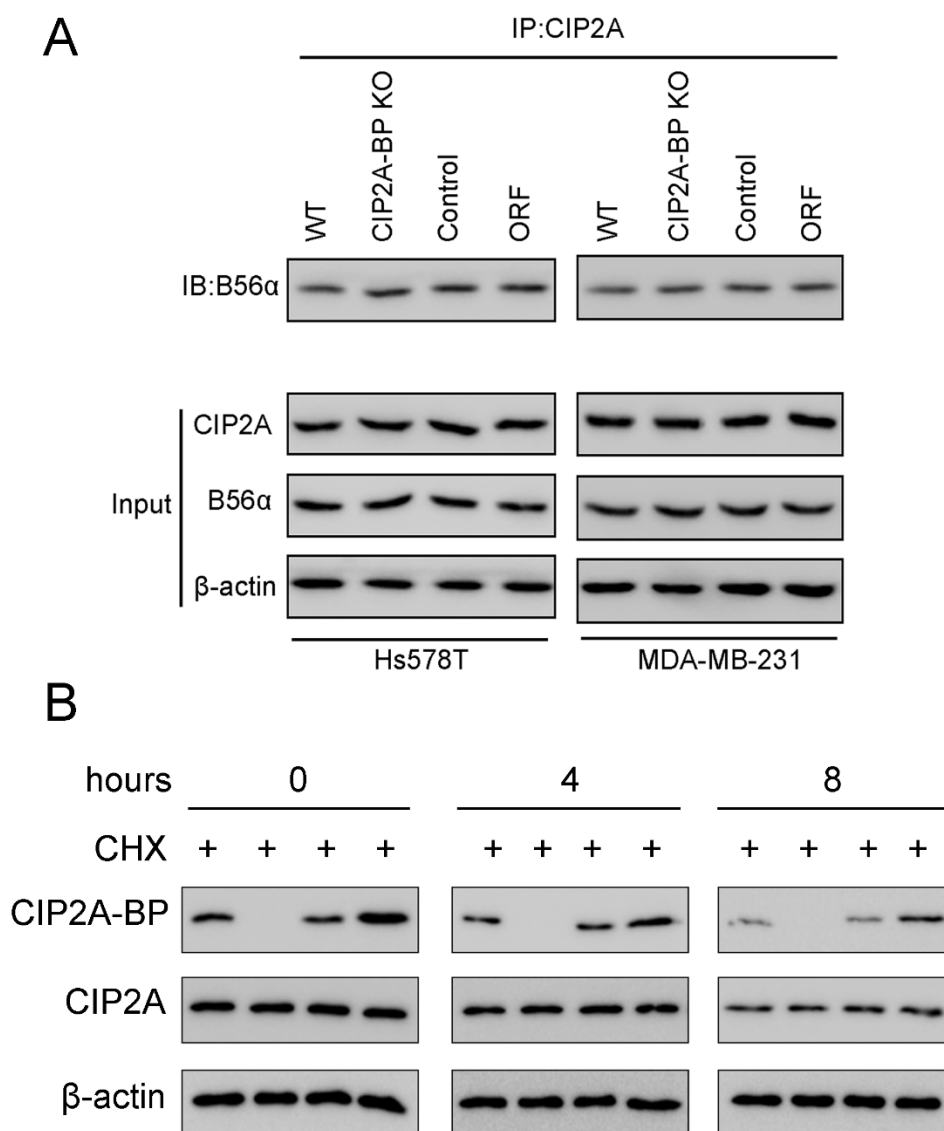

## Appendix Figure S8. Micropeptide CIP2A-BP does not affect the stability of CIP2A and its binding to the B56 $\alpha$ subunit of PP2A

(A) Co-immunoprecipitation assays showed that the interaction between CIP2A and B56 $\alpha$  in TNBC cells was unaffected by CIP2A-BP expression.

(B) After cells were treated with translation inhibitor (CHX, 100 $\mu$ g/ml) for the indicated periods, the stability of CIP2A protein in whole-cell lysates was assessed by immunoblotting analysis.

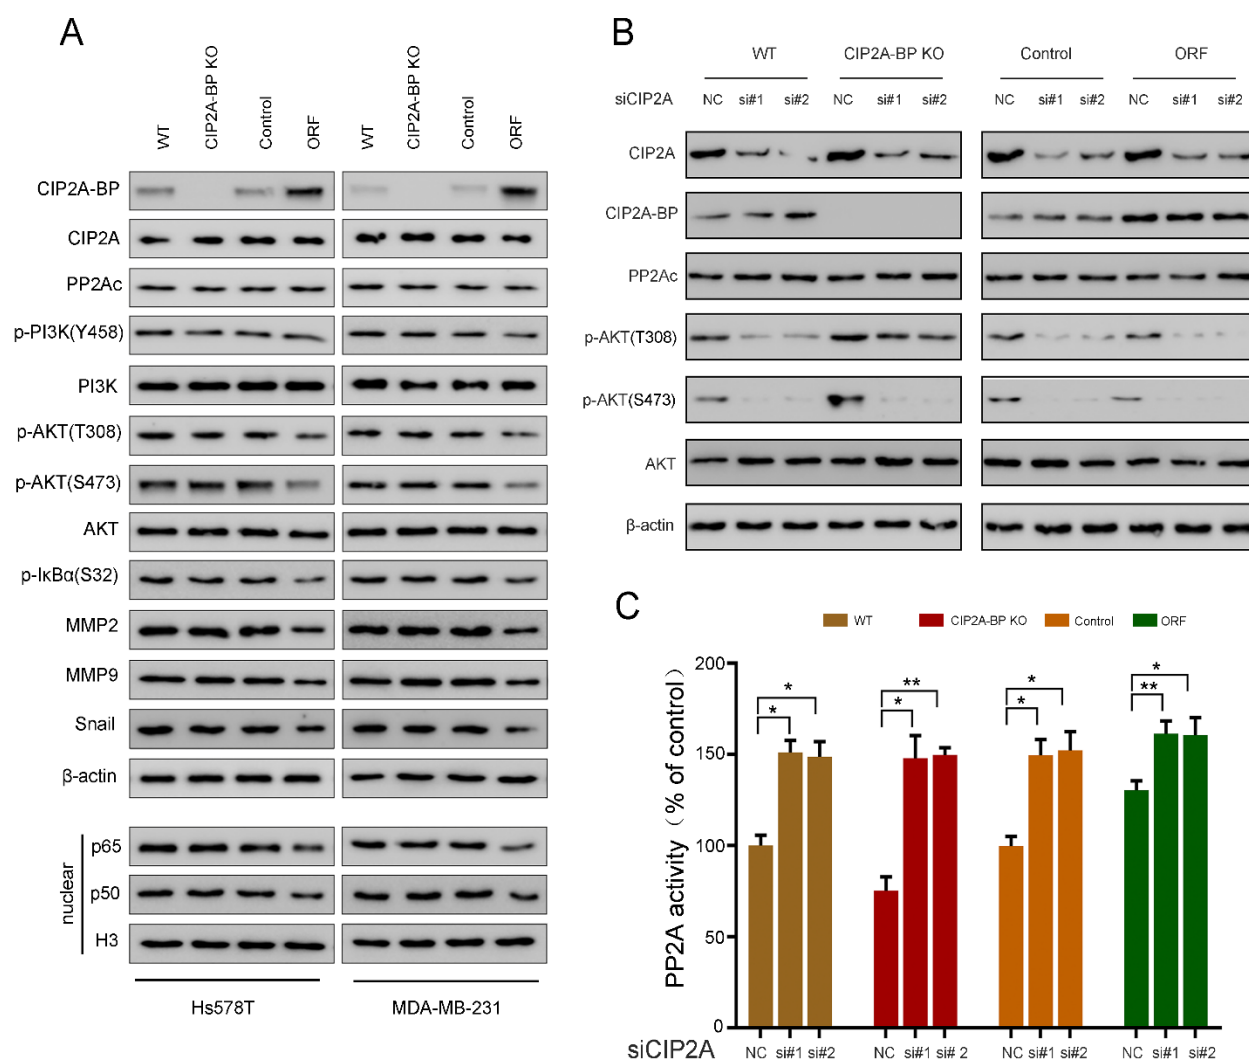

## Appendix Figure S9. Related to Figure 6

(A) The expression levels of the indicated proteins were detected by immunoblotting analysis in CIP2A-BP KO, *LINC00665* ORF overexpressed (OE) and respective controls of TNBC cells treated with TGF- $\beta$ .

(B) Hs578T cells were transfected with anti-CIP2A siRNAs. Whole-cell lysates of these cells were subjected

to immunoblot analysis with CIP2A, CIP2A-BP, PP2Ac, p-AKT, AKT and  $\beta$ -actin antibodies.

(C) CIP2A-BP KO, *LINC00665* ORF overexpressed (OE) and respective control Hs578T cells were transfected with anti-CIP2A siRNA. PP2A activity assay was performed to evaluate PP2A activity in the indicated cells.

Data information: Data are representative of 3 independent experiments (C). Data were assessed by paired Student's t test and are represented as mean  $\pm$  SD. \* $P < 0.05$ ; \*\* $P < 0.01$ .

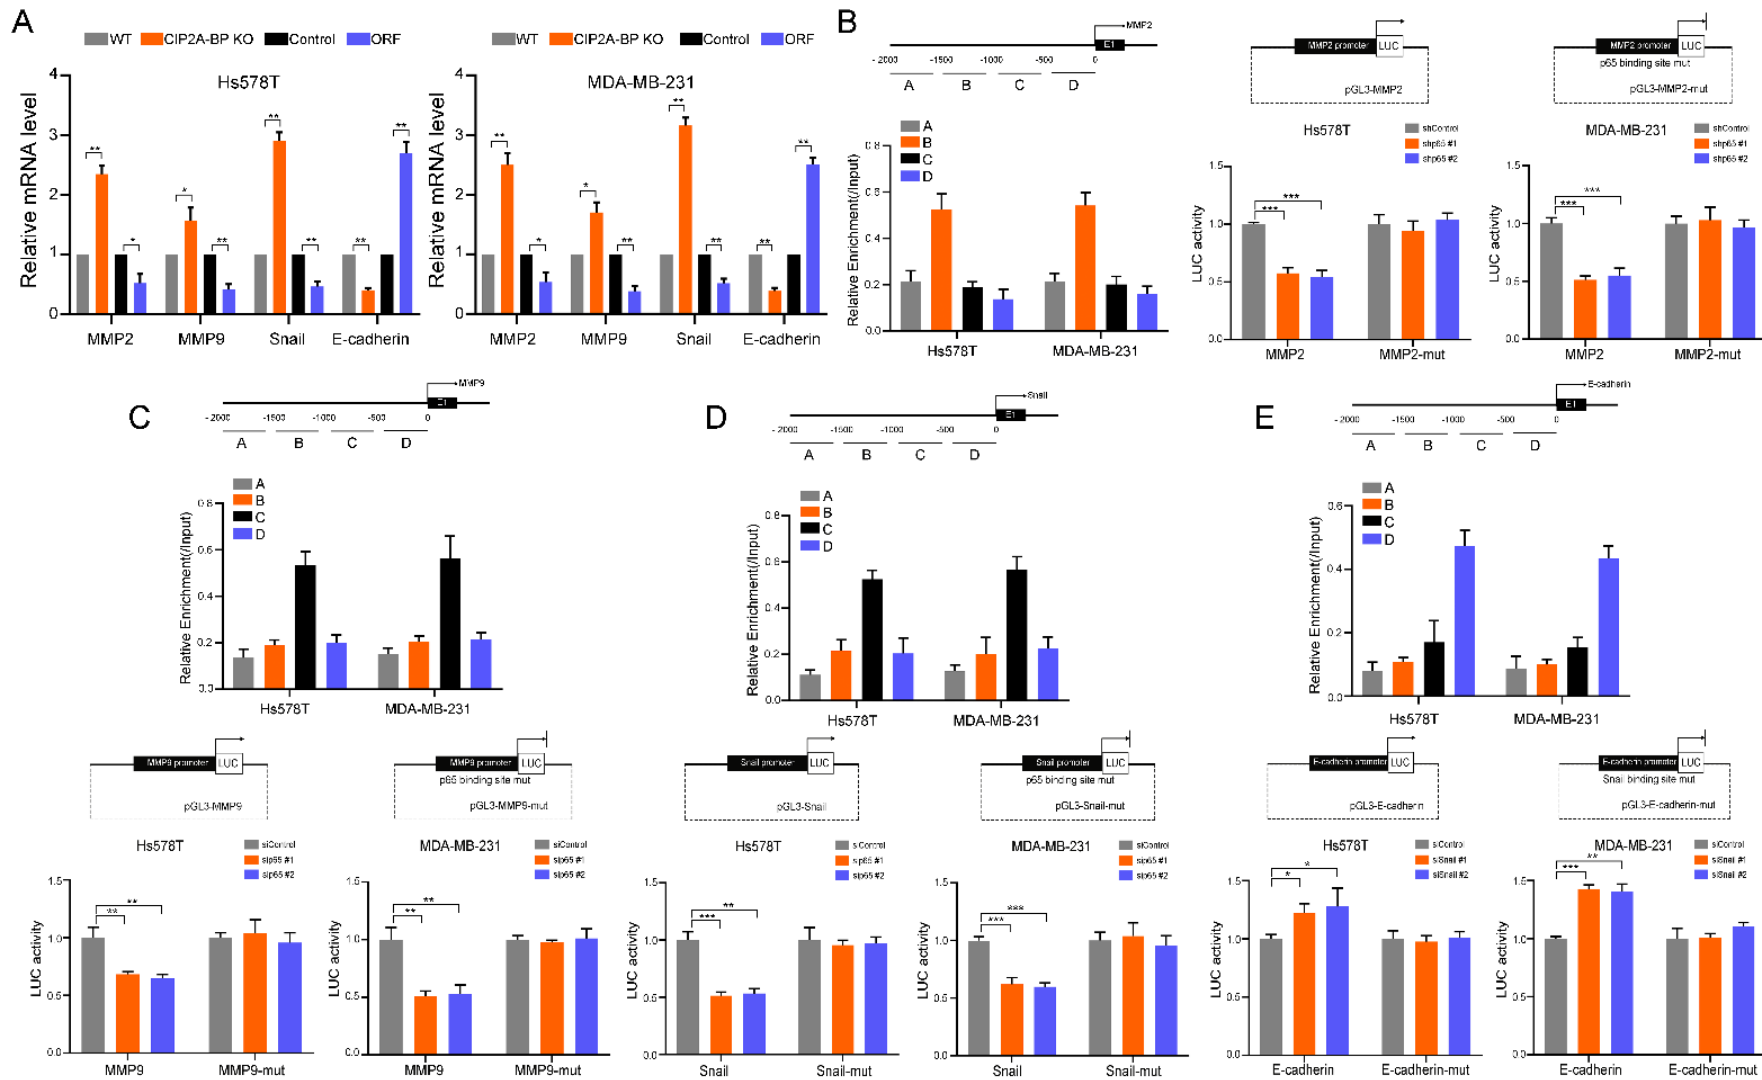

Appendix Figure S10. Micropeptide CIP2A-BP affects the transcription of *MMP2*, *MMP9*, *Snail* and *E-cadherin* genes through PI3K/AKT/ NF $\kappa$ B

signaling pathways

(A) Relative *MMP2*, *MMP9*, *Snail* and *E-cadherin* RNA levels were determined by qRT-PCR.

(B-D) Chromatin immunoprecipitation showing p65 occupancy at the *MMP2* (B), *MMP9* (C) and *Snail* (D) promoter region, and *MMP2*, *MMP9* and *Snail* promoter activity levels were measured using the luciferase assay in TNBC cells.

(E) Chromatin immunoprecipitation showing Snail occupancy at the *E-cadherin* promoter region, and *E-cadherin* promoter activity levels were measured using the luciferase assay in TNBC cells.

Data information: Data are representative of 3 (A-E) or 4 (B-G) independent experiments. Data were assessed by paired Student's t test (A-E) and are represented as mean ± SD. \**P* < 0.05; \*\**P* < 0.01; \*\*\**P* < 0.001.

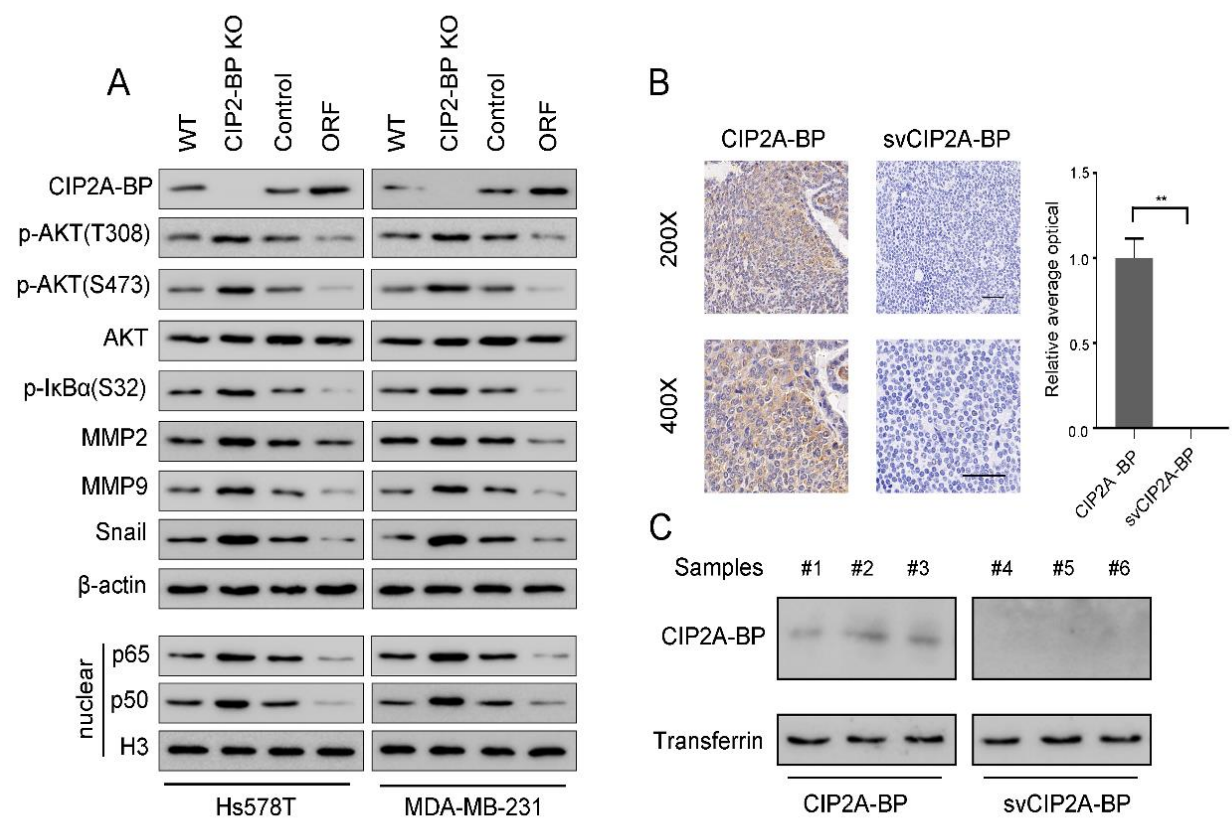

Appendix Figure S11. Related to Figure 6 and Figure 7

(A) Immunoblotting analysis of expression of the indicated proteins in TNBC cells untreated with specific

antagonist against AKT (MK-2206).

(B) MMTV-PyMT mice were injected with CIP2A-BP or svCIP2A-BP via mammary fat pad.

Immunohistochemistry (IHC) staining of CIP2A-BP of mammary tumors.

(C) The levels of CIP2A-BP were detected by immunoblotting analysis in serum samples of mice injected with CIP2A-BP or svCIP2A-BP via tail vein.

Data information: Data are representative of 3 independent experiments (B). Data were assessed by paired Student's t test (B) and are represented as mean  $\pm$  SD.  $**P < 0.01$ . Scale bars: 50 $\mu$ m (B).

**Appendix Table S1. Primary clinical and histological characteristics of 217 study patients**

| Characteristics                | Suzhou population | Guangzhou population | Overall         |
|--------------------------------|-------------------|----------------------|-----------------|
|                                | Patients, n (%)   | Patients, n (%)      | Patients, n (%) |
| <b>Age (years)</b>             |                   |                      |                 |
| ≤40                            | 23 (20.5)         | 34 (32.4)            | 57 (26.3)       |
| 41–60                          | 77 (68.8)         | 67 (63.8)            | 144 (66.3)      |
| ≥60                            | 12 (10.7)         | 4 (3.8)              | 16 (7.4)        |
| <b>Age at menarche (years)</b> |                   |                      |                 |
| ≤14                            | 57 (50.9)         | 52 (49.5)            | 109 (50.2)      |
| >14                            | 55 (49.1)         | 53 (50.5)            | 108 (49.8)      |
| <b>Menopausal history</b>      |                   |                      |                 |
| Pre-menopausal                 | 77 (68.8)         | 49 (46.7)            | 126 (58.1)      |
| Menopausal                     | 35 (31.2)         | 56 (53.3)            | 92 (41.9)       |
| <b>Body mass index</b>         |                   |                      |                 |
| ≤20                            | 36 (32.1)         | 24 (22.9)            | 60 (27.6)       |
| 20 < BMI < 28                  | 71 (63.4)         | 73 (69.5)            | 144 (66.4)      |
| ≥28                            | 5 (4.5)           | 8 (7.6)              | 13 (5.0)        |
| <b>Family history</b>          |                   |                      |                 |
| Positive                       | 4 (3.6)           | 11 (10.5)            | 15 (6.9)        |
| Negative                       | 108 (96.4)        | 94 (89.5)            | 202 (93.1)      |
| <b>Pathological type</b>       |                   |                      |                 |
| Invasive ductal carcinoma      | 105 (93.8)        | 97 (92.4)            | 202 (93.1)      |
| Others carcinoma               | 7 (6.2)           | 8 (7.6)              | 15 (6.9)        |
| <b>Smoking</b>                 |                   |                      |                 |
| Positive                       | 40 (35.7)         | 27 (25.7)            | 67 (30.9)       |
| Negative                       | 72 (64.3)         | 78 (74.3)            | 150 (69.1)      |
| <b>Drinking</b>                |                   |                      |                 |
| Positive                       | 78 (69.6)         | 63 (60.0)            | 141 (65.0)      |
| Negative                       | 34 (30.4)         | 42 (40.0)            | 76 (35.0)       |
| <b>Stage</b>                   |                   |                      |                 |
| I                              | 25 (22.3)         | 24 (22.9)            | 49 (22.6)       |
| II                             | 42 (37.5)         | 37 (35.2)            | 79 (36.4)       |
| III                            | 31 (27.7)         | 29 (27.6)            | 60 (27.6)       |
| IV                             | 14 (12.5)         | 15 (14.3)            | 29 (13.4)       |
| <b>Lymph node invasion</b>     |                   |                      |                 |
| Positive                       | 56 (50.0)         | 49 (46.7)            | 105 (48.4)      |
| Negative                       | 56 (50.0)         | 56 (53.3)            | 112 (51.6)      |

**Appendix Table S2. Virus Strains and Recombinant DNA Used in This Study**

| Virus Strains            | Source     | Identifier |
|--------------------------|------------|------------|
| Lentivirus pLVX-IRES-neo | Genepharma | N/A        |

|                                            |            |         |
|--------------------------------------------|------------|---------|
| Lentivirus pLVX-IRES-neo-LINC00665 ORF-His | Genepharma | N/A     |
| pcDNA3.1(+)                                | Invitrogen | V790-20 |
| ORF-His                                    | This paper | N/A     |
| ORFmut-His                                 | This paper | N/A     |
| ORF2-His                                   | This paper | N/A     |
| ORF3-His                                   | This paper | N/A     |
| ORF4-His                                   | This paper | N/A     |
| pEGFP-N1 (GFPwt)                           | Clontech   | 6085-1  |
| GFPmut                                     | This paper | N/A     |
| ORF-GFPmut                                 | This paper | N/A     |
| ORFmut-GFPmut                              | This paper | N/A     |

### Appendix Table S3. Antibodies

| Antibodies                                        | Source                    | Identifier |
|---------------------------------------------------|---------------------------|------------|
| Mouse Monoclonal anti-His                         | Santa Cruz                | sc-53073   |
| Mouse Monoclonal anti-GFP                         | Santa Cruz                | sc-9996    |
| Rabbit Polyclonal anti-CIP2A-BP                   | This paper                | N/A        |
| Rabbit polyclonal anti- $\beta$ -actin            | Abcam                     | Ab8227     |
| Rabbit polyclonal anti-E-Cadherin                 | BosterBio                 | PB9561     |
| Rabbit polyclonal anti-N-Cadherin                 | BosterBio                 | PA1328     |
| Rabbit Monoclonal anti-Phospho-Smad2 (Ser465/467) | Cell Signaling Technology | 3108       |
| Rabbit Monoclonal anti-Smad2                      | Cell Signaling Technology | 5339       |
| Rabbit Monoclonal anti-Phospho-Smad3 (Ser423/425) | Cell Signaling Technology | 9520       |
| Rabbit Monoclonal anti-Smad3                      | Cell Signaling Technology | 9523       |
| Rabbit Monoclonal anti-Smad4                      | Cell Signaling Technology | 38454      |
| Rabbit Polyclonal anti- Phospho-4EBP1 (Ser65)     | Cell Signaling Technology | 9451       |
| Rabbit Polyclonal anti- Phospho-4EBP1 (Thr70)     | Cell Signaling Technology | 9455       |
| Rabbit Polyclonal anti-eIF4EBP1                   | Cell Signaling Technology | 9452       |
| Rabbit Polyclonal anti-eIF4E                      | Abcam                     | Ab1126     |
| Rabbit Monoclonal anti-Filamin A                  | BosterBio                 | BM4039     |
| Rabbit Polyclonal anti-CIP2A                      | Abcam                     | Ab99518    |
| Rabbit Polyclonal anti-ANXA2                      | BosterBio                 | BA0641     |
| Rabbit Polyclonal anti-MYL6                       | Abcam                     | Ab174169   |
| Rabbit Polyclonal anti-CLTC                       | Bioss                     | bs-2932R   |
| Mouse Monoclonal anti-PFKP                        | Abcam                     | Ab119796   |
| Rabbit Polyclonal anti-Myc tag                    | Abcam                     | Ab9106     |
| Mouse Monoclonal anti-PP2A-B56 $\alpha$           | Santa Cruz                | sc-136045  |
| Mouse Monoclonal anti-PP2A-B56 $\gamma$           | Santa Cruz                | sc-374380  |
| Mouse Monoclonal anti-PP2Ac                       | BD Biosciences            | 610555     |

|                                                     |                           |           |
|-----------------------------------------------------|---------------------------|-----------|
| Rabbit Polyclonal anti- Phospho-PI3K(Tyr458)        | Invitrogen Antibodies     | PA5-17387 |
| Rabbit Monoclonal anti- PI3K                        | Cell Signaling Technology | 4257      |
| Rabbit Monoclonal anti-Phospho-Akt (Thr308)         | Cell Signaling Technology | 4056      |
| Mouse Monoclonal anti-Phospho-Akt (Ser473)          | Cell Signaling Technology | 4051      |
| Mouse Monoclonal anti-AKT                           | Cell Signaling Technology | 2920      |
| Rabbit Monoclonal anti-Phospho-IkB $\alpha$ (Ser32) | Abcam                     | Ab92700   |
| Rabbit Polyclonal anti-p65                          | Abcam                     | Ab16502   |
| Rabbit Monoclonal anti-p50                          | Abcam                     | Ab32360   |
| Rabbit Polyclonal anti-MMP2                         | Abcam                     | Ab97779   |
| Rabbit Polyclonal anti-MMP9                         | Abcam                     | Ab73734   |
| Mouse Monoclonal anti-Snail                         | Cell Signaling Technology | 3895      |
| Rabbit Monoclonal anti-H3                           | Cell Signaling Technology | 4499      |
| Rabbit Polyclonal anti-Phospho-mTOR (Ser2448)       | Cell Signaling Technology | 2971      |
| Rabbit Polyclonal anti-mTOR                         | Cell Signaling Technology | 2972      |
| Rabbit Polyclonal anti-CXADR                        | Abcam                     | Ab100811  |
| Rabbit Polyclonal anti-CABLES1                      | Abcam                     | Ab134258  |
| Rabbit Polyclonal anti-SOCS3                        | Abcam                     | Ab16030   |
| Rabbit Polyclonal anti-Transferrin                  | Abbkine                   | ABP52968  |
| Goat anti-Mouse IgG (H+L) HRP                       | Santa Cruz                | sc-2005   |
| Goat anti-Rabbit IgG (H+L) HRP                      | Santa Cruz                | sc-2004   |

**Appendix Table S4. Primers Used for qPCR**

|                   | <b>Forward primers sequence</b> | <b>Reverse primers sequence</b> |
|-------------------|---------------------------------|---------------------------------|
| LINC00665         | AGGTACCCACCAGATGTGTCT           | ACCACAAGAAAGGTGGATGGA           |
| DANCR             | GTTCTTAGCGCAGGTTGAC             | AACTGAAGGGATAGTTGGCT            |
| PVT1              | CTGACTTCGCTGATTAAGTGG           | AGACTGGCTCATCAGATGG             |
| DLEU2             | CTTAAGTCTGTTACTTGGATTACGG       | ATTATCCACTTCCTGGATACTCTC        |
| LINC00630         | AGATGGGAATCACATTGCTC            | ACAGATTACCTGGCAAAGAG            |
| CASC15            | CTACAGATGTGTAAACACCCAG          | ATTGCCATGATTCACACCTG            |
| LUCAT1            | CAATGGTATTTCTGACTTGGCT          | AGCGAAACTCTGTAGCTCAG            |
| LINC00910         | TAGAACTGGTATCTCTTCAACTACC       | CCTGTCTTCTGGAATGGCT             |
| LINC00511         | CTTCTCCTGTAACGTGTGG             | CTGATTCCACCACGTTCTC             |
| LINC01133         | AGGAGCCATTAACAAAGCT             | GAATCTTCAGTTGCAGGGA             |
| LINC00887         | GTCTCCATTTACAGATGAGAG           | GTTTAAGAGGAGGCTGCTG             |
| LINC00473         | TAGAACATCACCTTGGTGC             | TCCCATATTTCTGTAAAGCTC           |
| MINCR             | GGCAAGAGCACTTCCTTCCG            | TCTTCTGCGAAGTTGGGAACC           |
| DSCR8             | CACTCGTTTCTGTAAACATGG           | CAAGATGAAGCTGGGATTAGG           |
| LINC00665 ORF-His | GTGGAGTCCTGGCCTTTTG             | GGTGGACGGATGAGAAACGG            |
| HPRT1             | CTTTGCTGACCTGCTGGATT            | TCCCCTGTTGACTGGTCATT            |
| circHIPK3         | TCGGCCAGTCATGTATCAA             | ACCAAGACTTGTGAGGCCAT            |
| $\beta$ -actin    | CATGTACGTTGCTATCCAGGC           | CTCCTTAATGTACGCACGAT            |

**Appendix Table S5. Primers Used for Northern**

|                  | <b>Forward primers sequence</b> | <b>Reverse primers sequence</b>              |
|------------------|---------------------------------|----------------------------------------------|
| <b>LINC00665</b> | GGTGCAAAGTGGGAAGTGTG            | TAATACGACTCACTATAGGG<br>TCCGGTGGACGGATGAGAAA |

**Appendix Table S6. Primers Used for ChIP**

|               | <b>Forward primers sequence</b> | <b>Reverse primers sequence</b> |
|---------------|---------------------------------|---------------------------------|
| 4E-BP1-A      | CTCGGTCTCCAAATGTGCTG            | GGAGGCTGAGGTGGAGAATT            |
| 4E-BP1-B      | GTGTTGGGATTACAGGCGTG            | GCTACAGGTGCACATTGAGC            |
| 4E-BP1-C      | AGGGTCTCTGTCACAAAGGG            | GAAGAGGGTGAAGAGGGGAG            |
| 4E-BP1-D      | TTGGA CTCAATTCAGGGGCT           | TTAGAGAGGGTGTGGGAGGA            |
| 4E-BP1-E      | CCCAACCCAGCCAAGGATTA            | GTCTGCTCACGGGCTCTT              |
| MMP2-A        | AATCGTGACCTCCAATGCCC            | GGAAGGGGGCAGATAGGACT            |
| MMP2-B        | AGTCAGGCGTTCCCAACAG             | TTGAATCCTTTCTGCGCCA             |
| MMP2-C        | TAAGGAAGCAACCTGGGACC            | GGAACGGGAAGGAATGGTCA            |
| MMP2-D        | GCACTGAGGGTGGACGTAGAG           | GATGCAGCGGAAACAAGGGAG           |
| MMP9-A        | ATCTCCATCTCACAGTCTCATTT         | ATTAAAGGGCCTACTATGTGCC          |
| MMP9-B        | TATAGACCCTGCCCGATGCC            | GCCAAATCTCCAGCCCCAAT            |
| MMP9-C        | TCTTGGGTCTTGGCCTTAGT            | GTCTTCCGCAGGCTGAATCT            |
| MMP9-D        | ACTTTCCTTGGCTGACCAC             | AAACTGCAGAGCTTGTGGGA            |
| Snail-A       | AGAATGAAAGGAAGCCAGCGT           | CAAAATCGTCCTCCCCTGGTT           |
| Snail-B       | CGGCACCAAGTGACTAAACAG           | CCTCACAGGTCTCACCGTTC            |
| Snail-C       | CTCGGGCCTTTTCCCTTGAT            | TTGACGAGGGAAACGCACAT            |
| Snail-D       | CGTCGGAAGGTCAGGTGTC             | TAGCGCAGAAGAACCACTCG            |
| E-cadherin-A  | GCTGGTCAGTGTCAAATGCT            | AGAATGGCATGAACCTGGGA            |
| E-cadherin -B | GGAGAAACTGAGGCTTTGGGA           | CTTCATGGGTAGTGAGTCAGC           |
| E-cadherin -C | TGGCTCACACCTGAAATCCT            | GCCTCTCTAGTAGCTGGGAG            |
| E-cadherin -D | CTCAGCCAAGTGTAAGAGCCC           | TGCACGGTTCTGATTCCACT            |

**Appendix Table S7. Sequences of siRNAs and shRNAs Used in This Study**

|           | <b>No.</b>     | <b>Sequence (5'-3')</b>     |
|-----------|----------------|-----------------------------|
| LINC00665 | shLINC00665-#1 | 5'-GTGGAATGTCAGTGACTTAGC-3' |
|           | shLINC00665-#2 | 5'-GCCTCCCTAGAGACCATTCT-3'  |
| Smad4     | siSmad4-#1     | 5'-GCCAUAGUGAAGGACUGUU-3'   |
|           | siSmad4-#2     | 5'-GCUCCUAGACGAAGUACUU-3'   |
| 4E-BP1    | si4E-BP1-#1    | 5'-CGAACCCUUCUCCGAAUUU-3'   |
|           | si4E-BP1-#2    | 5'-GAUCAUCUAUGACCGGAAA-3'   |
| CIP2A     | siCIP2A-#1     | 5'-GGACGUGGUUUACUGCGAU-3'   |
|           | siCIP2A-#2     | 5'-GCGUAAAUAACCUCGCUAAA-3'  |

|       |                          |                                                            |
|-------|--------------------------|------------------------------------------------------------|
| P65   | sip65-#1<br>sip65-#2     | 5'-GCUGCAGUUUGAUGAUGAAGA-3'<br>5'-UGGAUUCAUUACAGCUUAAUC-3' |
| Snail | siSnail-#1<br>siSnail-#2 | 5'-GCAGUAAUUUAUAUAUUA-3'<br>5'-GUUUAUUGAUUAUCAAUAAG-3'     |
